# Supplementary material
Source: PubMed Central journal article supplement (PMC3805793)
Supplement: NIHMS510954-supplement-01.pdf [file NIHMS510954-supplement-01.pdf]

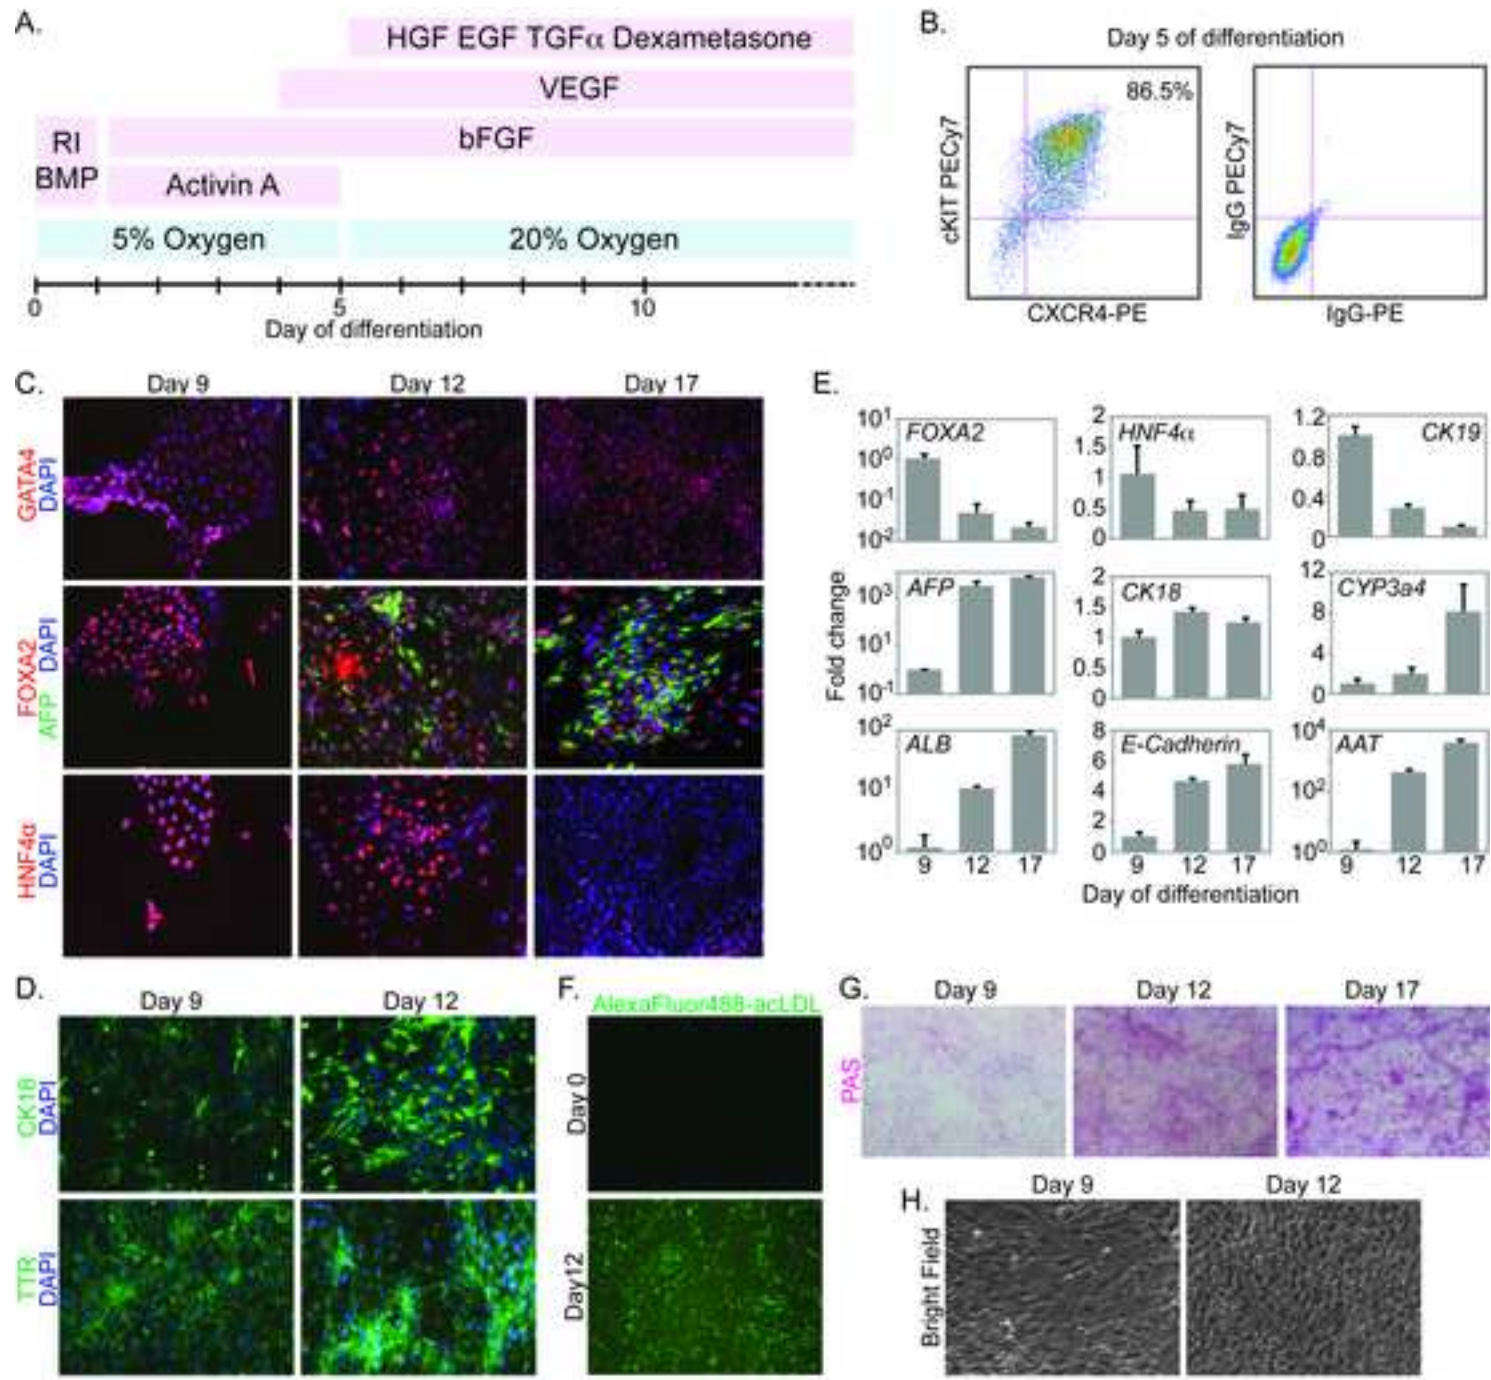

Supplemental Figure 1

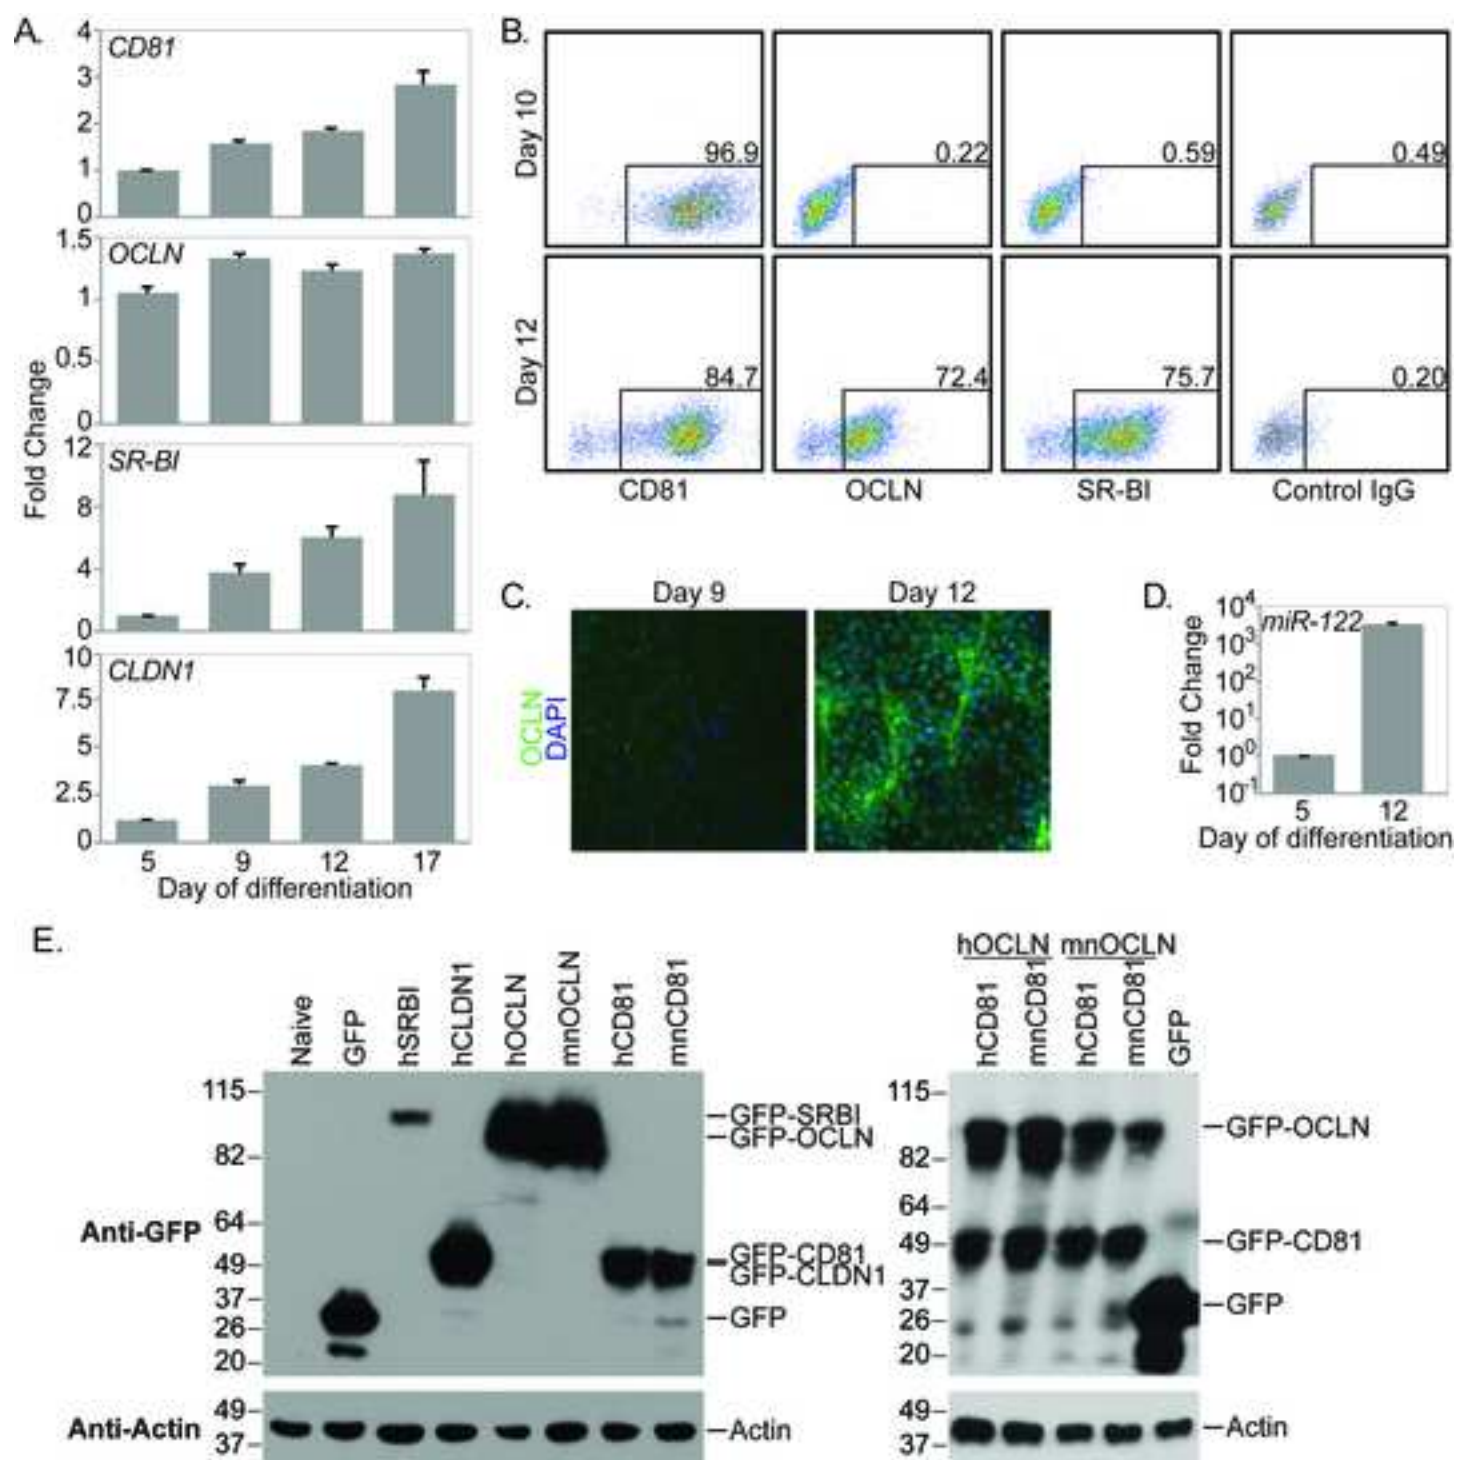

Supplemental Figure 2

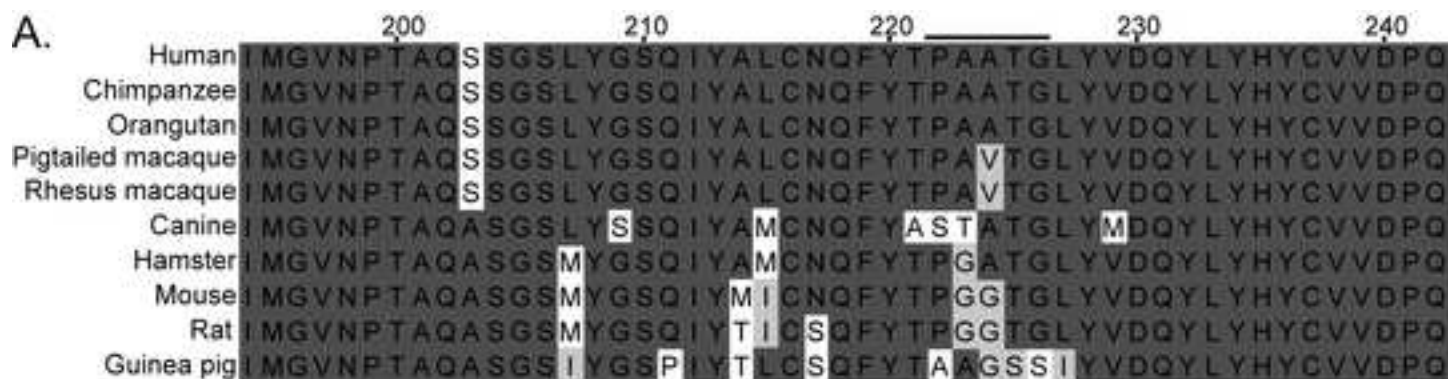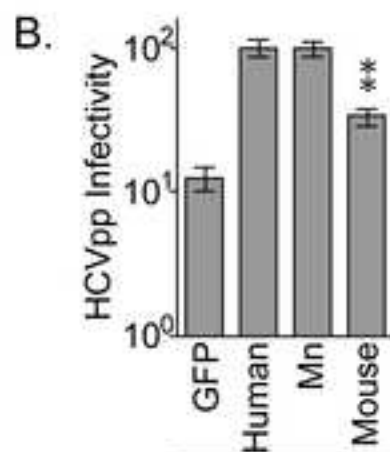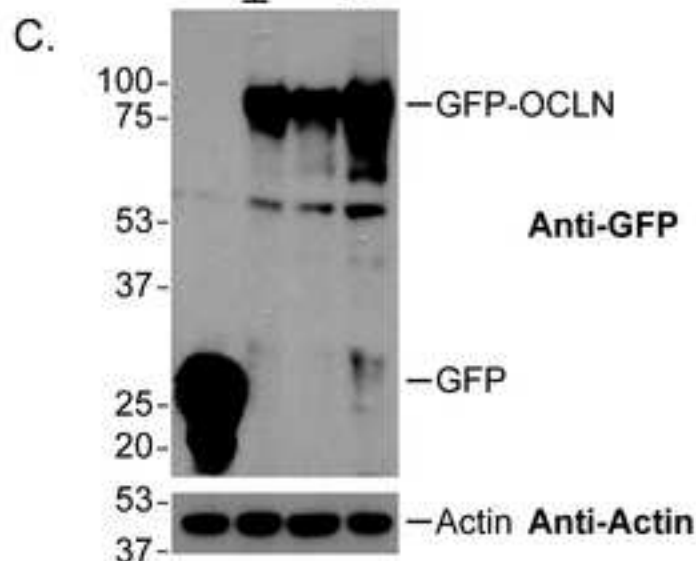

Supplemental Figure 3

**A.**

|                      | 160                                                                               | 170                                               | 180                     | 190 | 200 |
|----------------------|-----------------------------------------------------------------------------------|---------------------------------------------------|-------------------------|-----|-----|
| Human                | S T L T                                                                           | A L T T S V L K N N L C P S G S N I I S N L F K E | D C H Q K I D D L F S G |     |     |
| Chimpanzee           | S T L T                                                                           | A L T T S V L K N N L C P S G S N I I S N L F K E | D C H Q K I D D L F S G |     |     |
| African Green Monkey | S T L A A L T T S V L K N N L C P S G S N I I S N L L K K D C H Q K I D E L F S G |                                                   |                         |     |     |
| Pigtailed macaque    | S T L A A L T T S V L K N N L C P S G S N I I S N L L K K D C H Q K I D E L F S G |                                                   |                         |     |     |
| Rhesus macaque       | S T L A A L T T S V L K N N L C P S G S N I I S N L L K K D C H Q K I D E L F S G |                                                   |                         |     |     |

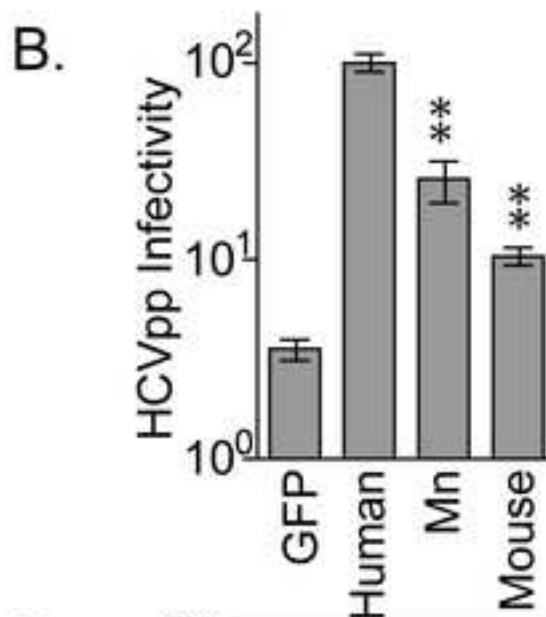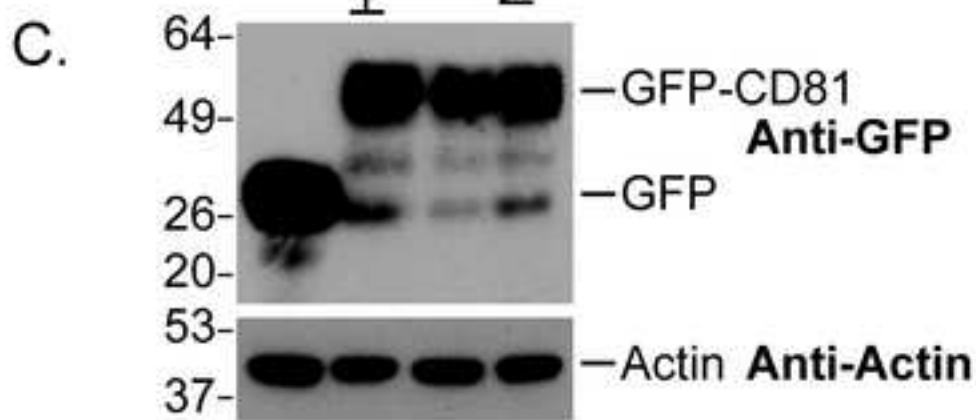

Supplemental Figure 4

## 1 **Supplemental Materials and Methods**

### 2 **Macaque iPSC cell Culture**

3           The derivation and validation of MniPSC line 3 has been previously described<sup>1</sup>. Prior to  
4 differentiation studies, the normal karyotype and the phenotype were confirmed by flow  
5 cytometry. Cells were maintained on irradiated mouse embryonic fibroblast feeder layers in  
6 mTESR media (Gibco) supplemented with 20ng/ml of basic fibroblast growth factor (bFGF)  
7 (R&D systems).

8

### 9 **Hepatic Differentiation**

10           MniPSCs were induced toward definitive endoderm and then specified toward the  
11 hepatic lineage using a modified version of a protocol for human ESCs that has been described<sup>2</sup>  
12 (Supplementary Figure 1A). Briefly, the day prior to differentiation, MniPSCs were harvested  
13 using accutase (Life Technologies) and passaged on matrigel (BD Biosciences) to exclude the  
14 MEFs. On day 0 of differentiation, MniPSCs were harvested using accutase and cultured in low  
15 cluster plates (Costar) to allow embryoid bodies (EB) formation in the presence of BMP4 (3  
16 ng/ml) and Y-27632 rock inhibitor (5  $\mu$ M, Calbiochem) in serum-free differentiation (SFD) media  
17 as previously described<sup>2</sup>. On day 1 of differentiation, endoderm program was induced with  
18 Activin-A (100 ng/ml) in SFD media supplemented with bFGF (2.5 ng/ml) and BMP4 (0.5 ng/ml).  
19 On day 4, the medium was changed to SFD media supplemented with Activin-A (100ng/ml),  
20 bFGF (2.5 ng/ml) and VEGF (10 ng/ml). On day 5, EBs were dissociated with trypsin/EDTA  
21 0.25% (Cellgro) and subsequently plated on gelatin-coated dishes (30,000 cells per well of 48  
22 well-plate) in defined hepatic media as previously described<sup>2</sup>. All cytokines were purchased from  
23 R&D Systems.

24

### 25 **RNA extraction and quantitative real time-PCR (qRT-PCR)**

26 Total RNA was prepared with the RNeasyMicro Kit (Qiagen). RNA was reverse  
27 transcribed into cDNA using the Superscript III First-strand Synthesis System kit (Life  
28 Technologies). All experiments were done in triplicate using the Roche SYBR Green master mix  
29 and the LightCycler 480 I Real Time PCR System (Roche). Relative quantification was  
30 calculated using the comparative threshold cycle (CT) method and was normalized against the  
31  $\Delta$ CT of the housekeeping gene  $\beta$ -actin. Melting curves for each gene were used to confirm  
32 homogeneity of the DNA product. The following primer sequences were used:

33 SRBI F 5'TCCTCGAGTACCGCACCTTCCA, R 5'AGTCAACCTTGCTCAGCCCGTT  
34 OCLN F 5'AGACCCAAGAGCAGCAAAGGGC, 5'ACAATGGCAATGGCCTCCTGGG  
35 CD81 F 5'ATGACCCGCAGACCACCAACCT, R 5'TCCTTGGCGATCTGGTCCTTGT  
36 AFP F 5'CTACCTGCCTTTCTGGAAGAACTTTG, R 5'GATCGATGCTGGAGTGGGCTTT  
37 FOXA2 F 5'AAGTGGGGTTCGAGACTTTG, R 5'CTGCAACAACAGCAATGGAG  
38 CK19 F 5'CCGCGACTACAGCCACTACT, R 5'GAGCCTGTTCCGTCTCAAAC  
39 ALB F 5'GTGAAACACAAGCCCAAGGCAACA, R 5'TCCTCGGCAAAGCAGGTCTC  
40 CK18 F 5'ATCTTGGTGATGCCTTGGAC, R 5'CCTCAGAACTTTGGTGTCATTG  
41 CYP3a4 F 5'GTGACCAAATCAGTGTGAGGAGGTA, R  
42 5'AGGAGGAGTTAATGGTGCTAACTGG  
43 HNF4 $\alpha$  F 5'CATCAGAAGGCACCAACCTCAACG, R 5'ATACTGGCGGTTCGTTGATGTAGTCC  
44 AAT F 5'AGGGCCTGAAGCTAGTGGATAAGT, R 5'TCTGTTTCTTGGCCTCTTCGGTGT  
45 ACTIN F 5'TTTTTGGCTTGACTCAGGATTT, R 5'GCAAGGGACTTCCTGTAACAAC  
46 CDH1 F 5'GGCCTGAAGTGAAGTACTCGTAACG, R 5'TCAGACTAGCAGCTTCGGAACC  
47 miR122 F 5'AGCAGAGCTGTGGAGTGTGAC, R 5'AGTAGCTATTTAGTGTGATAA  
48 CLDN1 F 5'GGGTTGCTTGCAATGTGCTGCTC, R 5'TCTCTGCCTTCTGCACCTGCC

49 For quantifying HCV RNA, qRT-PCR was performed on 20 ng of total RNA or 2  $\mu$ l of  
50 extracted RNA from supernatant, prepared with the Qiaamp Viral RNA kit (Qiagen), with the HCV  
51 5'UTR Taqman assay kit (Pa03453408\_s1, Applied Biosystems) and the LightCycler 480

52 Master Hydrolysis Probes kit (Roche) using the LightCycler 480 II Real Time PCR System  
53 (Roche).

54

#### 55 **Flow cytometry**

56 Day 5 EBs or MnHep cells at day 10 and 12 were dissociated with trypsin 0.25%. Cells  
57 were stained with CXCR4-PE (R&D systems), cKIT-PECy7 (BD Bioscience), CD81 (BD  
58 Bioscience), OCLN (Invitrogen), CLA-1/SR-BI (BD Bioscience) or IgG control (BD Bioscience) in  
59 PBS with BSA 0.1% at 4°C for 20 minutes, with 0.05% saponin (Sigma) for OCLN and CLA-  
60 1/SR-BI. Cells were then incubated with a donkey anti-rabbit IgG-AlexaFluor488 or donkey anti  
61 mouse IgG- AlexaFluor488 (Invitrogen). Cells were analyzed using a LSRII flow cytometer  
62 (Becton Dickinson).

63

#### 64 **Immunocytochemistry**

65 Cells were fixed in 4% paraformaldehyde/PBS for 15 minutes at room temperature and  
66 rinsed with 1X PBS. For intracellular staining, cells were permeabilized with 0.1% Triton X100 in  
67 PBS for 10 minutes at room temperature. Cells were incubated overnight with control isotype  
68 (mouse IgG or rabbit IgG, Jackson Immunoresearch Laboratories) or with monoclonal  
69 antibodies anti-AFP (Dako), anti-FOXA2 (Novus), anti-GATA4 (Santa Cruz), anti-HNF4 $\alpha$  (Santa  
70 Cruz) anti-CK18 (Sigma), anti-TTR (Abbiotec), anti-CD81 (BD Bioscience) and OCLN  
71 (Invitrogen). Cells were than incubated with secondary antibodies donkey anti-rabbit IgG-Cy5,  
72 donkey anti-mouse IgG-Cy3 or donkey anti-goat IgG-Cy3 (Jackson Immunoresearch  
73 Laboratories) for 1 hour at room temperature and counterstained with 40,6-diamidino-2-  
74 phenylindole (DAPI). Stained cells were visualized using a confocal or regular fluorescent  
75 microscope (Leica) and images captured using the Leica software. For HCV E2 staining, cells  
76 were permeabilized with 0.05% saponin for 10 minutes at room temperature, incubated 1 hour  
77 with anti-E2 monoclonal antibody (clone AR3A)<sup>11</sup>, provided by Mansun Law (Scripps Research

78 Institute), then incubated with goat anti-mouse IgG-AlexaFluor568 (Invitrogen), and finally  
79 counterstained with Hoechst (Invitrogen).

80

### 81 **Hepatic Functional Assays**

82 For LDL-acetylated uptake, cells were incubated 6 hours at 37C with AlexaFluor488-acLDL  
83 (Invitrogen). Stained cells were visualized using a fluorescent microscope (Leica).

84 For Peridic Acid Shiff (PAS) staining, cells were fixed in 4% paraformaldehyde/PBS for 15  
85 minutes at room temperature prior to performing the PAS assay as per manufacturer instruction  
86 (Sigma).

87

### 88 **Virus generation and infection.**

89 HCV and VSVG pseudoparticles production was performed as previously described<sup>4, 5</sup> by  
90 cotransfection of three plasmids encoding (i) a provirus containing the desired reporter (V1-  
91 GLuc), (ii) HIV Gag-Pol, and (iii) the necessary envelope glycoprotein(s) (HCV H77 1a E1E2 or  
92 VSVG). Briefly, 293-T cells were seeded at  $7 \times 10^6$  cells/well into a poly-L-lysine (Sigma, St.  
93 Louis, MO)-coated 10 mm diameter plate. Transfection was performed the next day with  
94 TransIT-LT1 Transfection Reagent (Mirus, Madison, WI). Supernatants were collected 2 and 3  
95 days post-transfection and filtered (0.45  $\mu$ m pore size). HCV pseudoparticles were concentrated  
96 200-times by centrifugation through a 20% sucrose cushion for 2h at 4°C and 34K rpm. All  
97 infection assays using pseudoparticles were performed in the presence of 4  $\mu$ g/ml polybrene  
98 (Sigma) and 0.01 M HEPES (Gibco).

99 To produce HCVcc, two HCV genome configurations were used. Both encoded the  
100 structural proteins and a portion of NS2 from the HC-J6 isolate cloned in the context of the rest  
101 of the genome from the JFH-1 isolate. This genome, termed Jc1, was used as it produced a  
102 high level of infectious virus in cell culture<sup>6</sup>. One configuration represented the normal HCV  
103 genomic organization, while the other was a reporter virus that expressed the *Gaussia principis*



104 luciferase protein (GLuc)<sup>7</sup> off the HCV internal ribosome entry site (IRES) with the IRES from  
105 the encephalomyocarditis virus directing translation of the HCV polypeptide. Plasmids encoding  
106 both HCVcc configurations were provided by Charles Rice (Rockefeller University). HCVcc  
107 stocks were produced as previously described<sup>5</sup>. Briefly, supernatants from Huh-7.5 cells  
108 transfected by electroporation with in vitro transcribed HCV genomic RNA were collected at 2, 3,  
109 and 4 days post-transfection and filtered (0.45µm pore size). HCVcc stocks were concentrated  
110 200-times by centrifugation through a 20% sucrose cushion for 2 hours at 4°C and 34,000 rpm.  
111 Depending on the efficiency of virus concentration, nonreporter HCV was used at an  
112 approximate multiplicity of infection (M.O.I.) of 1 to 10, and GLuc expressing HCVcc was used  
113 at an M.O.I. of 0.01 and 0.1, as determined by titration on Huh-7.5 cells.

114 Infections were performed, in triplicate, on cells seeded on 48 well plates with 10 µl of  
115 HCVpp or HCVcc, or 0.01 µl of VSVGpp added in 0.2 ml fresh media. For pseudoparticle  
116 infections media was supplemented with plus 4 µg/ml polybrene (Sigma) and 50 mM Hepes  
117 (Gibco). MnHep were infected at day 12 or day 13 of differentiation. Twenty-four hours post-  
118 infection, cells were washed three times with fresh media to remove Gluc protein present in the  
119 inoculum. Supernatants were harvested two days post infection in 25 µl Renilla luciferase assay  
120 lysis buffer (Promega, Madison, WI) and the expression of the luciferase reporter was measured  
121 as previously described<sup>8</sup>.

122 Virus titration was performed by limiting dilution assay as previously described<sup>9</sup>. Briefly,  
123 rows of Huh-7.5 cells seeded in poly-L-lysine coated 96-well plates at  $3 \times 10^4$  cells/well were  
124 infected with serial dilutions of virus. Three days post infection, infected cells were fixed and  
125 immunostained for NS5A as described in using the clone 9E10 anti-NS5A antibody, provided by  
126 Charles Rice (Rockefeller University) and detection was performed with the ImmPRESS  
127 peroxidase anti-mouse conjugated antibody (Vector Laboratories, Burlingame, CA). Wells that  
128 expressed at least one NS5A-expressing cell were counted as positive, and the TCID50 was  
129 calculated according to the method of Reed and Muench<sup>10</sup>.

130 To neutralize HCVpp infection, the anti-E2 monoclonal antibody (clone AR3A)<sup>11</sup>,  
131 provided by Mansun Law (Scripps Research Institute), was used at a concentration of 10  
132 µg/ml. The HCV polymerase inhibitor 2'C-methyl-adenosine (2'CMA)<sup>12</sup> was provided by Timothy  
133 Tellinghuisen (Scripps Research Institute) and used at 6 µM to inhibit HCVcc intracellular RNA  
134 replication.

135

### 136 **Rescue and activity evaluation of HCV cell entry factors.**

137 As the coding sequences for Mn OCLN and CD81 have not been previously reported, we  
138 rescued their ORF sequences by RT-PCR with oligos designed of highly conserved regions of  
139 each. To ensure that the correct sequences were identified, multiple independent cDNA  
140 synthesis and PCR reactions were used to assemble consensus sequences. Reverse  
141 transcription was performed using the Superscript III First-strand Synthesis System (Invitrogen),  
142 according to manufacturer's instructions, with an oligo dT primer and total RNA prepared from  
143 day 13 post differentiation MnHep cells as template. The Mn OCLN sequence was PCR  
144 amplified from this cDNA with forward (5' GAAGATCAGCTGACCATGACA) and reverse (5'  
145 AAAATTCTTAATTGGAGTGTTTCAGCCCAGT), which anneal just before and after the protein  
146 coding sequence. This sequence has been deposited in Genbank as accession number  
147 KF188431. For cell culture expression, oligos 5'- A GAC ACC GAC TCT AG A GGA TCT AGA  
148 ATG TCA TCC AGG CCT CTT GAA AGT and 5'-  
149 TTGCTCACCATGTTTAAACCCGGTGGGGATCTTGTTTTCTGTCTATCATAGTCTCC were  
150 used to precisely amplify the coding sequence. A 'sequence- and ligation-independent cloning'  
151 method<sup>13</sup> was used to clone this product into the TRIP plasmid<sup>14, 15</sup>, a self-inactivating lentiviral  
152 provirus that expresses no HIV proteins, but instead employs an internal CMV promoter to  
153 express cloned genes. For vector, TRIP-hOCLN-PmeIGFP, which is a TRIP vector encoding the  
154 human OCLN orf fused to the amino-terminus of GFP and has been previously described<sup>8</sup>, was

155 digested with the restriction enzymes XbaI and PmeI (New England Biolabs). This plasmid was  
156 designated TRIP-MnOCLN-GFP.

157 The Mn CD81 orf was amplified from the above cDNA with forward (5' GCT AGC ATG  
158 GGA GTG GAG GGC TGC ACC) and reverse oligos (5' ACT AGT GTA CAC GGA GCT GTT  
159 CCG GAT), and the rescued sequence was deposited in Genbank as accession number  
160 KF188430. To clone the coding sequence into the TRIP plasmid, this product was digested with  
161 NheI and SpeI and ligated into like digest TRIP-GFP-hCD81-linker<sup>16</sup>, which encodes the human  
162 CD81 protein fused to the carboxyl-terminus of GFP, to generate TRIP-GFP-MnCD81-linker.

163 VSVGpp lentiviral pseudoparticles encapsidating either the above TRIP vectors, or  
164 TRIP-GFP<sup>14, 15</sup>, TRIP-GFP-hSRBI-linker<sup>16</sup>, which encodes GFP fused to the human SR-BI  
165 protein, and TRIP-GFP-hCLDN1-linker<sup>16</sup>, which encodes GFP fused to the human CLDN1  
166 protein, were generated as described above. To generate MnHep cells expressing these  
167 proteins, the pseudoparticles were concentrated by ultracentrifugation for 2h at 4°C and 34K  
168 rpm. All transductions were performed in the presence of 4 µg/ml polybrene (Sigma) and 0.01 M  
169 HEPES (Gibco). Transduction efficiency was monitored by GFP expression and immunoblotting  
170 confirmed transgene expression.

171 To test OCLN and CD81 related HCV cell entry functions, human 786-O or HepG2 cells,  
172 which are deficient in endogenous OCLN and CD81, respectively, were transduced with  
173 unconcentrated VSVGpp supernatants. Transduction efficiency was monitored by GFP  
174 expression and immunoblotting confirmed transgene expression.

175

#### 176 **Immunoblot Analysis.**

177 For immunoblot analysis of GFP expression, transduced MnHep were lysed in a volume  
178 of 1x SDS-PAGE sample buffer plus dithiothreitol (DTT) that was proportional to the  
179 approximate cell confluency. Cell lysates were passed through a 22-gauge needle several times  
180 and heated 5 minutes at 95°C. Equivalent volumes of lysate were immunoblotted with rabbit

181 anti-GFP (ab290; Abcam, Cambridge, MA) and mouse anti- $\beta$ -actin antibodies (AC-15; Sigma, St.  
182 Louis, MO), to ensure analysis of comparable protein concentrations. For both antibodies,  
183 horseradish peroxidase (HRP) conjugated goat anti-mouse and goat anti-rabbit secondary  
184 antibody (GE Healthcare Lifescience) was used and detection was performed with Immobilon  
185 Chemiluminescent HRP (Millipore, Billerica, MA).

186

187 **Statistical analysis.** Data were analyzed for statistical significance using Prism software  
188 (GraphPad Software) using the Mann-Whitney test. A p-value  $\leq 0.05$  was considered significant.

189

190 **Acknowledgements.** We are grateful to Charles Rice for pseudoparticle and HCVcc related  
191 plasmids, Timothy Tellinghuisen for 2'CMA, and Mansun Law for the E2 monoclonal antibody.  
192 M.S. was supported by the Robin Chemers Neustein Postdoctoral Fellowship. H.P.K. is a  
193 Markey Molecular Medicine investigator and the recipient of the Jose Carreras/E.D. Thomas  
194 Chair for Cancer Research, and NIH grants R01 HL098489 and P51 RR00016. V.G.E was  
195 supported by the Black Family Stem Cell Institute at the Icahn School of Medicine at Mount  
196 Sinai and the NIH grant R01 DK087867. M.J.E. was supported by NIH grants R01 DK095125,  
197 R00 AI077800, and R56 AI091792, an American Cancer Society Research Scholar Grant  
198 (RSG-12-176-01-MPC) and the Pew Charitable Funds (M.J.E.).

199

## 200 **Supplemental References**

- 201 1. **Zhong B, et al. Stem Cells Dev 2011;20:795-807.**
- 202 2. **Goldman O, et al. Cell Stem Cell 2013;In Press.**
- 203 3. **Gouon-Evans V, et al. Nat Biotechnol 2006;24:1402-11.**
- 204 4. **Evans MJ, et al. Nature 2007;446:801-5.**
- 205 5. **Ploss A, et al. Nature 2009;457:882-6.**

- 206 6. Pietschmann T, et al. *Proc Natl Acad Sci U S A* 2006;103:7408-13.
- 207 7. Tannous BA, et al. *Mol Ther* 2005;11:435-43.
- 208 8. Michta ML, et al. *J Virol* 2010;84:11696-708.
- 209 9. Lindenbach BD, et al. *Science* 2005;309:623-6.
- 210 10. Reed LJ, et al. *Am. J. Hyg.* 1938;27:493-497.
- 211 11. Law M, et al. *Nat Med* 2008;14:25-7.
- 212 12. Carroll SS, et al. *J Biol Chem* 2003;278:11979-84.
- 213 13. Li MZ, et al. *Methods Mol Biol* 2012;852:51-9.
- 214 14. Sirven A, et al. *Mol Ther* 2001;3:438-48.
- 215 15. Zennou V, et al. *Cell* 2000;101:173-85.
- 216 16. Sabo MC, et al. *J Virol* 2011;85:7005-19.
- 217 17. Flint M, et al. *J Virol* 2006;80:11331-42.

218

219

220 **Supplemental Figure 1. Generation of hepatocytes from macaque iPSCs.** (A) Illustration of  
221 the hepatic differentiation protocol used to generate MnHep cells from MniPSC cells, as  
222 described in the Supplemental Materials and Methods. (B) By day five of endoderm  
223 differentiation, the majority of cells (86.5%) had developed into definitive endoderm-enriched  
224 populations, as gauged by the flow cytometry analysis of co-expression of two endodermal  
225 markers CXCR4 and cKIT. On day five, endoderm-enriched populations cells were plated onto  
226 gelatin and specified toward the hepatic lineage. On the indicated days of differentiation, cells  
227 were fixed and immunostained for (C) the endoderm markers FOXA2 and GATA4, and (D) the  
228 hepatic markers HNF4 $\alpha$ , alphafetoprotein (AFP), and Transthyretin (TTR), and the epithelial  
229 marker cytokeratin 18 (CK18). Nuclei of cells were also counterstained with DAPI. Note that  
230 virtually all cells express GATA4 and FOXA2, and that most cells are positive for AFP, CK18  
231 and TTR, indicative of an efficient endoderm induction and hepatic specification. (200-fold

232 magnification) (E) Relative transcript levels, as determined by qRT-PCR at the indicated days of  
233 differentiation, of early hepatic endoderm markers *FOXA2*, *HNF4* $\alpha$ , and *CK19* decreased over  
234 time, while markers for specification and maturation *AFP*, *CK18*, *CYP3a4*, albumin (*ALB*),  
235  $\alpha$ 1antitrypsin (*AAT*), and E-cadherin increased over time, indicative of maturation of hepatic  
236 cells. Levels of the master regulator of hepatic cell fate, *HNF4* $\alpha$ , remained relatively constant  
237 with time. Shown are means and standard deviations from three independent cultures. (F)  
238 MnHep cells at 12 days post differentiation, but not MnIPS cells, efficiently internalize acetylated  
239 LDL (AlexaFluor488-acLDL) (green staining). (G) Periodic Acid Schiff staining (lower panels) of  
240 day 9, 12 and 17 hepatic cultures show increasing glycogen storage (red staining) with time in  
241 hepatic cells. The bright field pictures (upper panels) demonstrate confluent monolayers in each  
242 culture.

243

244 **Supplemental Figure 2. MnHep HCV entry factor expression.** At the indicated days of  
245 hepatic differentiation, the expression levels of the cellular factors required for HCV cell entry in  
246 naïve MnHep cells were gauged by (A) qRT-PCR (means and standard deviations of n=3  
247 analysis, normalized to *ACTIN*), (B) flow cytometry analysis for CD81, occludin, SR-B1 and IgG  
248 control (as a suitable antibody to stain MnCLDN1 was not identified, this protein was not  
249 analyzed by FACS), and (C) immunostaining for OCLN. Note that although OCLN transcript  
250 levels do not vary greatly, this protein is not detected until 12 days into the differentiation  
251 process. (D) The levels of miR-122 were quantified by qRT-PCR from total RNA samples  
252 collected at the indicated day of differentiation. (E) Immunoblot with antibodies that bind either  
253 GFP, to track transgene expression, or Actin, as a loading control of lysates from naïve MnHep  
254 cells or those transduced with lentiviruses to express a fusion protein of GFP and the indicated  
255 HCV cell entry factor. Approximate molecular weight (kDa) marker positions are indicated to the  
256 left and the predicted size of each expressed protein is marked on the right of each blot.

257

258 **Supplemental Figure 3. Comparison of OCLN ortholog HCV cell entry functions.** (A) The  
259 MnOCLN coding sequence was amplified from MnHep cDNA as described in Materials and  
260 Methods. The MnOCLN protein sequence had 97.3% identity and 98.7% similarity to human  
261 OCLN, and 99.8% identity and 99.8% similarity to the Rhesus macaque OCLN protein (only  
262 encoded a single alanine to valine change in the second transmembrane domain at amino acid  
263 position 157). Shown is an alignment of the OCLN second extracellular loop sequences of the  
264 indicated species, with amino acid numbering corresponding to the human OCLN sequence and  
265 identical and similar amino acids dark and light shaded, respectively. We previously showed  
266 that this region contains the determinants for differences in OCLN HCV cell entry factor activity  
267 between these species<sup>8</sup>. A line above the alignment marks the cluster of residues shown to be  
268 most important for species-specific functions. (B) To test OCLN entry factor activities, 786-O  
269 cells, which are unable to support HCV cell entry due to insufficient levels of endogenous  
270 OCLN<sup>5</sup>, were transduced to express either GFP alone or GFP fused to OCLN from the indicated  
271 species. These cells were challenged with HCVpp as described in Materials and Methods.  
272 Luciferase reporter levels, assayed two days post infection are shown normalized to parallel  
273 infections with VSVGpp, which infect nearly all mammalian cells and thus help control for cell  
274 number variations, and set relative to infections of cells expressing human OCLN. Mean and  
275 standard error of two independent experiments, each performed in quadruplicate, are shown.  
276 (C) Immunoblots for either GFP or actin of lysates from 786-O cell populations transduced to  
277 express the indicated transgenes. Approximate molecular weight (kDa) marker positions are  
278 indicated to the left of each blot. \*\* $P < 0.01$  (Mann-Whitney test)

279

280 **Supplemental Figure 4. Comparison of CD81 ortholog HCV cell entry functions.** (A) The  
281 MnCD81 coding sequence was amplified from MnHep cDNA as described in Materials and  
282 Methods. While this sequence shared 98.3% identity and 99.2% similarity with the human  
283 CD81 sequence, it has 100% identity with the Rhesus macaque and African green monkey

284 CD81 proteins, the latter of which was previously shown to mediate HCV cell entry less  
285 efficiently than the human version due to diminished HCV E2 glycoprotein binding<sup>17</sup>. Shown in  
286 this figure are the only four amino acid differences between these sequences, all occurring in  
287 the CD81 large extracellular loop. The amino acid positions are labeled above the sequence  
288 and identical and similar amino acids are dark and light shaded, respectively. (B) HCVpp  
289 infectivity (normalized to parallel VSVGpp infections and relative to infections of cells expressing  
290 human OCLN) of HepG2 cells, which do normally do not support HCV cell entry due to a lack of  
291 endogenous CD81, expressing either GFP alone or GFP fused to the CD81 protein from the  
292 indicated species. Mean and standard error of two independent experiments, each performed in  
293 quadruplicate, are shown. (C) Immunoblots for either the GFP or actin of lysates from HepG2  
294 cell populations transduced to express the indicated transgenes. Approximate molecular weight  
295 (kDa) marker positions are indicated to the left of each blot. \*\* $P < 0.01$  (Mann-Whitney test)  
296
